# Supplementary material for: Effects of Short-Term Inhibition of Rho Kinase on Dromedary Camel Oocyte In Vitro Maturation
Source: MDPI journal article supplement (doi:10.3390/ani10050750), 2020-04-25
Supplement: s1 [file s1]

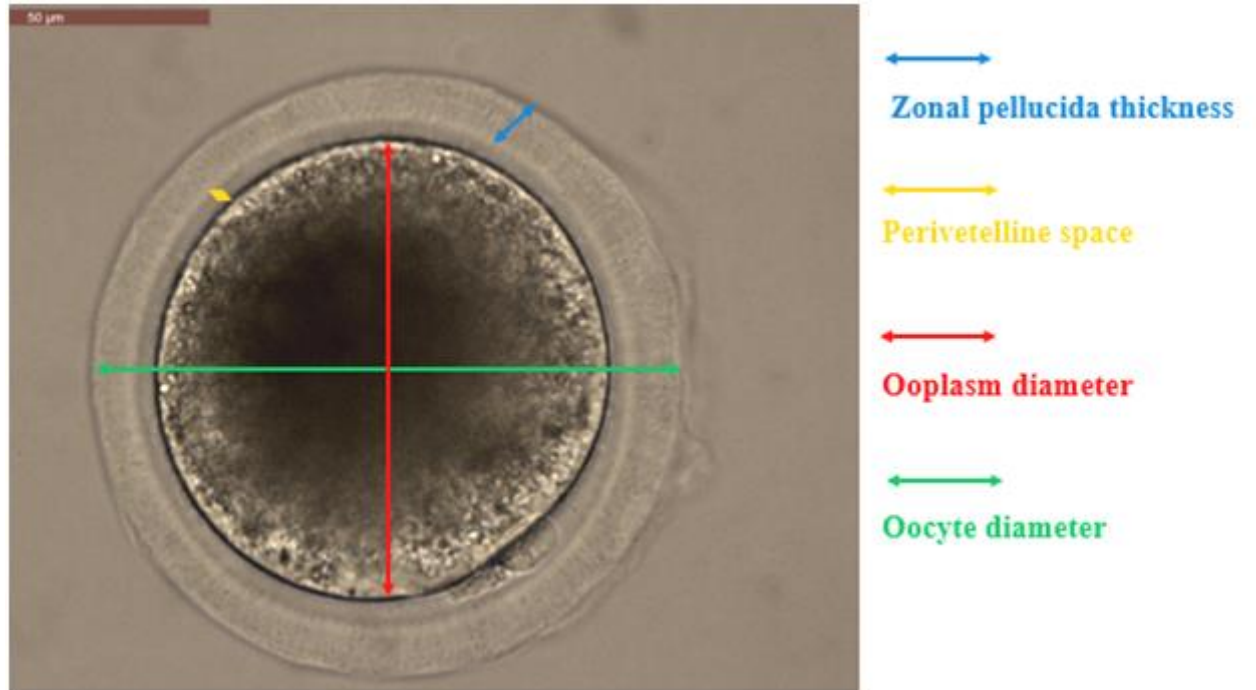

**Figure S1:** Camel oocyte morphometry parameters. Scale bar = 50  $\mu\text{m}$ .

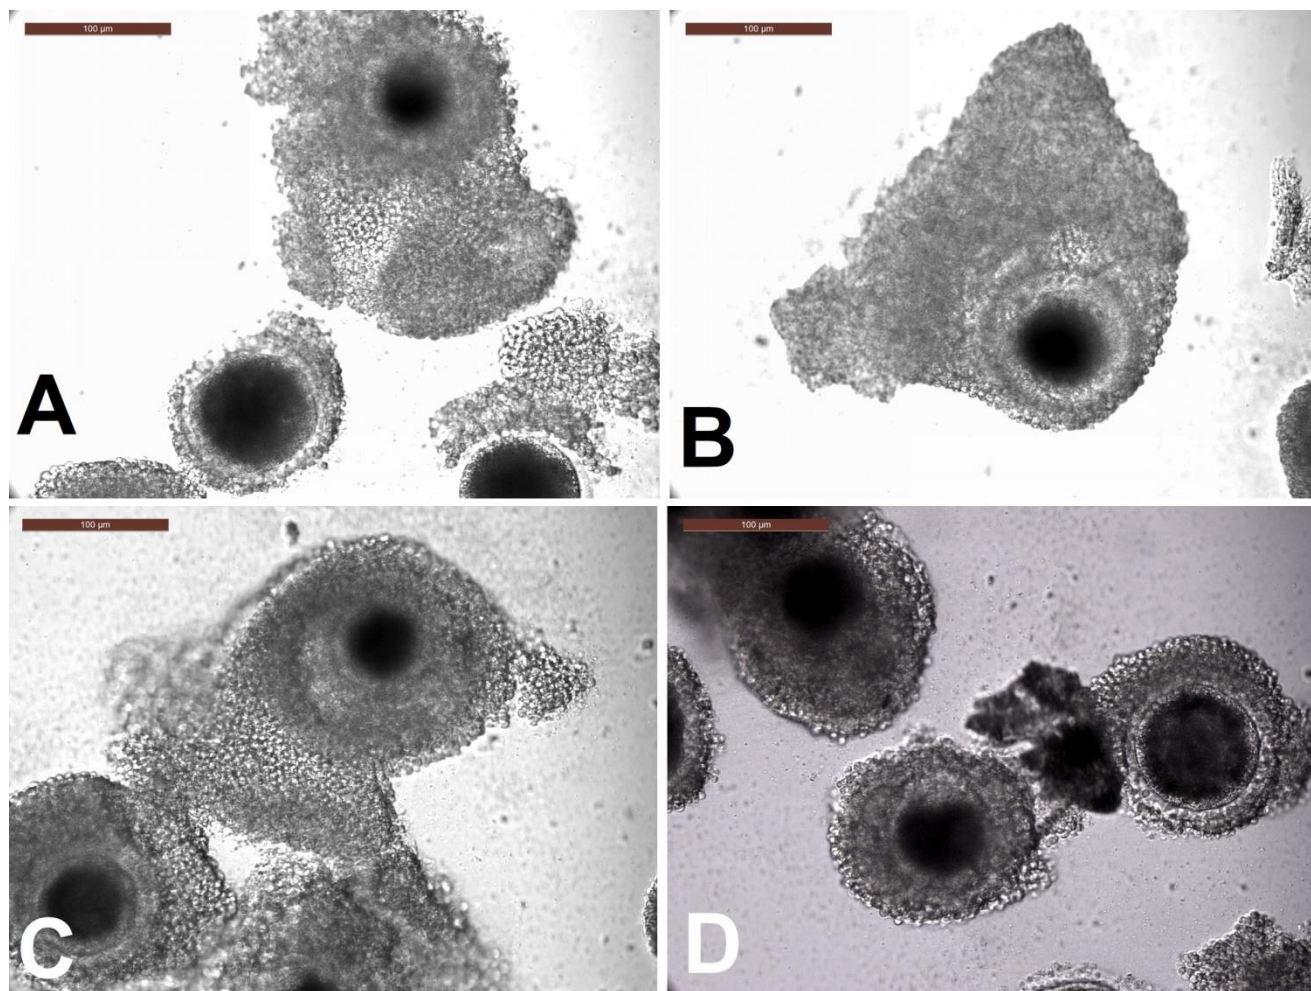

**Figure S2: Effect of short-term supplementation on cumulus morphology of COCs.** A: Control group, B: Cumulus morphology after pre-IVM with RI for 2 hour, C: Cumulus morphology after pre-IVM with RI for 4 hour, and D: Cumulus morphology after pre-IVM with RI for 6 hour. All groups were in comparison with control group and cumulus morphology after pre-IVM showed no significant difference. **Scale bar = 100 µm.**
